# Supplementary material for: Virtual Reality and Physiotherapy in Post-Stroke Functional Re-Education of the Lower Extremity: A Controlled Clinical Trial on a New Approach
Source: MDPI journal article supplement (doi:10.3390/jpm11111210), 2021-11-16
Supplement: s1 [file s1]

**Table S1.** Individual results data of the clinical scales (1-10: *CP+VR*; 11-20: *CP*).

| ID Patient |      | Fugl-Meyer | Functional Ambulation Category | Functional Independence Measure | Berg Balance Scale | Trunk Control Test | Degree of Satisfaction |
|------------|------|------------|--------------------------------|---------------------------------|--------------------|--------------------|------------------------|
| 1          | pre  | 85         | 1                              | 94                              | 39                 | 74                 | -                      |
|            | post | 99         | 2                              | 100                             | 47                 | 100                | 60                     |
| 2          | pre  | 57         | 3                              | 70                              | 44                 | 87                 | -                      |
|            | post | 62         | 3                              | 70                              | 48                 | 100                | 55                     |
| 3          | pre  | 49         | 1                              | 84                              | 16                 | 62                 | -                      |
|            | post | 50         | 1                              | 84                              | 17                 | 49                 | 30                     |
| 4          | pre  | 61         | 3                              | 67                              | 44                 | 87                 | -                      |
|            | post | 73         | 3                              | 81                              | 53                 | 100                | 52                     |
| 5          | pre  | 100        | 3                              | 122                             | 50                 | 100                | -                      |
|            | post | 108        | 4                              | 122                             | 53                 | 100                | 58                     |
| 6          | pre  | 106        | 5                              | 126                             | 56                 | 100                | -                      |
|            | post | 111        | 5                              | 126                             | 56                 | 100                | 60                     |
| 7          | pre  | 111        | 5                              | 126                             | 56                 | 100                | -                      |
|            | post | 111        | 5                              | 126                             | 56                 | 100                | 60                     |
| 8          | pre  | 82         | 4                              | 123                             | 48                 | 100                | -                      |
|            | post | 86         | 4                              | 123                             | 50                 | 100                | 54                     |
| 9          | pre  | 62         | 0                              | 44                              | 5                  | 49                 | -                      |
|            | post | 65         | 1                              | 52                              | 15                 | 49                 | 59                     |
| 10         | pre  | 39         | 0                              | 67                              | 5                  | 37                 | -                      |
|            | post | 57         | 1                              | 81                              | 5                  | 50                 | 55                     |
| 11         | pre  | 47         | 0                              | 33                              | 5                  | 37                 | -                      |
|            | post | 52         | 0                              | 32                              | 5                  | 37                 | -                      |
| 12         | pre  | 105        | 5                              | 117                             | 46                 | 100                | -                      |
|            | post | 109        | 4                              | 117                             | 56                 | 100                | -                      |
| 13         | pre  | 99         | 4                              | 117                             | 40                 | 87                 | -                      |
|            | post | 103        | 4                              | 117                             | 44                 | 87                 | -                      |
| 14         | pre  | 105        | 4                              | 105                             | 45                 | 100                | -                      |
|            | post | 108        | 5                              | 113                             | 53                 | 100                | -                      |
| 15         | pre  | 94         | 2                              | 63                              | 26                 | 61                 | -                      |
|            | post | 107        | 3                              | 73                              | 41                 | 74                 | -                      |
| 16         | pre  | 94         | 2                              | 98                              | 40                 | 100                | -                      |
|            | post | 106        | 4                              | 122                             | 48                 | 100                | -                      |
| 17         | pre  | 67         | 1                              | 64                              | 15                 | 37                 | -                      |
|            | post | 73         | 1                              | 78                              | 24                 | 74                 | -                      |
| 18         | pre  | 81         | 3                              | 72                              | 41                 | 100                | -                      |
|            | post | 89         | 3                              | 101                             | 41                 | 100                | -                      |
| 19         | pre  | 75         | 1                              | 50                              | 25                 | 100                | -                      |
|            | post | 82         | 2                              | 79                              | 39                 | 100                | -                      |
| 20         | pre  | 108        | 4                              | 124                             | 50                 | 87                 | -                      |
|            | post | 112        | 4                              | 126                             | 52                 | 100                | -                      |

**Table S2:** Median scores and interquartile ranges of the two groups of patients, before and after the intervention. Inter and intragroup contrasts.

| Clinical scales                 | CP                     |                      | CP+VR                |                       | Pre-Post Treatment comparisons <sup>a</sup> |       |     |
|---------------------------------|------------------------|----------------------|----------------------|-----------------------|---------------------------------------------|-------|-----|
|                                 | Pre                    | Post                 | Pre                  | Post                  | CP                                          | CP+VR |     |
| Trunk Control Test              | 87<br>(65-100)         | 100<br>(62.5 -100)   | 93.5<br>(67.5-100)   | 100<br>(77.3-100)     | ,1                                          | ,16   |     |
| FMLE                            | a.Pain/<br>Ampl        | 39,5<br>(36-40)      | 40<br>(38.3-40)      | 35.5<br>(33.3-39.8'5) | 38,50<br>(35.3-39.8)                        | ,102  | ,02 |
|                                 | b.Sensibility          | 20,00<br>(13.5-22.8) | 23,50<br>(14.3-24)   | 10,00<br>(4-24)       | 10,00<br>(4-24)                             | ,03   | 1   |
|                                 | c. Motor<br>evaluation | 24,50<br>(15.3-30.3) | 31,00<br>(20.3-32.8) | 17,00<br>(14-24.8)    | 22.5<br>(16.8-30.5)                         | ,02   | ,01 |
|                                 | d. Balance             | 9<br>(8.25-10.8)     | 10<br>(9.25-11.8)    | 7<br>(6-10.8)         | 10<br>(6.25-11.8)                           | ,02   | ,03 |
|                                 | FM Total               | 72<br>(76.5-104)     | 79.5<br>(62.8-106)   | 79.8<br>(62.8-106)    | 105<br>(83.8-108)                           | ,02   | ,02 |
| Berg Balance Scale              | 44,00<br>(21.8-49.5)   | 49<br>(42.4.5- 53)   | 40<br>(25.3-44)      | 42.5<br>(39.5- 51)    | ,01                                         | ,01   |     |
| Functional Ambulation Category  | 3<br>(1 – 3.75)        | 3<br>(1,25-4)        | 2.5<br>(1.25-4)      | 3,5<br>(2.25-4)       | ,15                                         | ,04   |     |
| Functional Independence Measure | 89<br>(67.8-123)       | 92<br>(81- 123)      | 85<br>(63.3-114)     | 107<br>(78.3-117)     | ,05                                         | ,03   |     |

<sup>a</sup>Wilcoxon tests. FMLE (Fugl-Meyer Lower Extremity).
